# Supplementary material for: Variable vertical land motion for sea level rise projections
Source: Research Square preprint supplement (doi:10.21203/rs.3.rs-4676043/v1), 2024-08-01
Supplement: Supplementary file 1 [file 7fffdb19f93cf91435cf836c.xlsx]

## Sheet: Table-S2
List of added and removed steps (from the UNR step archive; http://geodesy.unr.edu/NGLStationPages/steps.txt for some GNSS sites, after visual inspection)
	site	date	code	description	threshold_distance	site_distance_from_eq	mag	this study
1	P578	2013-07-10	1	Elevation_Cutoff_Changed				deleted
2	P608	2014-07-10	1	Elevation_Cutoff_Changed				deleted
3	BUEG	2008-06-22	0	added	0	0	0	addded
4	BUEG	2010-01-16	0	added	0	0	0	addded
5	BUEG	2013-01-17	0	added	0	0	0	addded
6	AZBH	2010-08-21	0	added	0	0	0	addded
7	AZGA	2015-07-18	0	added	0	0	0	addded
8	AZGE	2010-07-18	0	added	0	0	0	addded
9	AZPA	2011-02-20	0	added	0	0	0	addded
10	AZPX	2008-12-17	0	added	0	0	0	addded
11	AZTH	2011-07-18	0	added	0	0	0	addded
12	AZYW	2022-06-18	0	added	0	0	0	addded
13	BFSH	2002-01-17	0	added	0	0	0	addded
14	BFSH	2002-05-17	0	added	0	0	0	addded
15	CA00	2027-02-18	0	added	0	0	0	addded
16	CA00	2002-01-19	0	added	0	0	0	addded
17	CAC1	2016-01-20	0	added	0	0	0	addded
18	CAC1	2016-01-14	0	added	0	0	0	addded
19	CAEC	2020-06-18	0	added	0	0	0	addded
20	CAFR	2005-01-17	0	added	0	0	0	addded
21	CACH	2020-02-19	0	added	0	0	0	addded
22	CAGW	2022-06-18	0	added	0	0	0	addded
23	CAHV	2001-01-18	0	added	0	0	0	addded
24	CAL5	2007-12-16	0	added	0	0	0	addded
25	CAOS	2020-12-16	0	added	0	0	0	addded
26	CAOV	2007-02-19	0	added	0	0	0	addded
27	CAPE	2003-12-16	0	added	0	0	0	addded
28	CAP4	2001-01-22	0	added	0	0	0	addded
29	CARK	2025-01-22	0	added	0	0	0	addded
30	CASD	2017-05-16	0	added	0	0	0	addded
31	CASM	2004-03-22	0	added	0	0	0	addded
32	CASN	2003-02-17	0	added	0	0	0	addded
33	CATE	2027-11-16	0	added	0	0	0	addded
34	CAVI	2005-11-18	0	added	0	0	0	addded
35	CAWI	2022-09-21	0	added	0	0	0	addded
36	CAWV	2002-12-16	0	added	0	0	0	addded
37	CJVG	2002-01-17	0	added	0	0	0	addded
38	CLA3	2007-08-21	0	added	0	0	0	addded
39	CLA3	2006-11-20	0	added	0	0	0	addded
40	COF1	2006-01-19	0	added	0	0	0	addded
41	DAEX	2003-03-14	0	added	0	0	0	addded
42	DAEX	2026-01-16	0	added	0	0	0	addded
43	DIAB	2019-07-22	0	added	0	0	0	addded
44	DIAB	2010-07-15	0	added	0	0	0	addded
45	DLNO	2020-04-16	0	added	0	0	0	addded
46	EOCG	2001-01-16	0	added	0	0	0	addded
47	EOCG	2025-12-14	0	added	0	0	0	addded
48	FLN1	2008-01-16	0	added	0	0	0	addded
49	FLN1	2018-12-18	0	added	0	0	0	addded
50	GCES	2016-09-20	0	added	0	0	0	addded
51	GCES	2026-04-18	0	added	0	0	0	addded
52	GRDV	2018-12-18	0	added	0	0	0	addded
53	GRDV	2012-01-16	0	added	0	0	0	addded
54	HOGS	2012-01-17	0	added	0	0	0	addded
55	JNHG	2001-11-20	0	added	0	0	0	addded
56	KFRC	2010-04-18	0	added	0	0	0	addded
57	KFRC	2027-07-21	0	added	0	0	0	addded
58	LBC2	2004-04-21	0	added	0	0	0	addded
59	LBCH	2012-11-20	0	added	0	0	0	addded
60	LLAS	2004-04-21	0	added	0	0	0	addded
61	LOMP	2010-01-17	0	added	0	0	0	addded
62	LRA4	2012-07-22	0	added	0	0	0	addded
63	LRA4	2010-11-21	0	added	0	0	0	addded
64	MASW	2028-11-14	0	added	0	0	0	addded
65	MLFP	2023-05-22	0	added	0	0	0	addded
66	NOPK	2024-05-22	0	added	0	0	0	addded
67	OREO	2004-02-19	0	added	0	0	0	addded
68	OREO	2004-02-17	0	added	0	0	0	addded
69	P016	2020-02-19	0	added	0	0	0	addded
70	P017	2020-02-19	0	added	0	0	0	addded
71	P093	2020-02-19	0	added	0	0	0	addded
72	P093	2002-02-17	0	added	0	0	0	addded
73	P127	2002-02-17	0	added	0	0	0	addded
74	P275	2002-02-17	0	added	0	0	0	addded
75	P284	2002-04-21	0	added	0	0	0	addded
76	P290	2021-10-12	0	added	0	0	0	addded
77	P291	2015-01-17	0	added	0	0	0	addded
78	P294	2015-01-17	0	added	0	0	0	addded
79	P295	2015-01-17	0	added	0	0	0	addded
80	P380	2022-03-19	0	added	0	0	0	addded
81	P471	2002-02-21	0	added	0	0	0	addded
82	P472	2002-01-21	0	added	0	0	0	addded
83	P474	2002-01-21	0	added	0	0	0	addded
84	P475	2002-01-21	0	added	0	0	0	addded
85	P476	2002-01-21	0	added	0	0	0	addded
86	P477	2012-10-20	0	added	0	0	0	addded
87	P477	2012-07-21	0	added	0	0	0	addded
88	P478	2008-08-21	0	added	0	0	0	addded
89	P506	2008-06-21	0	added	0	0	0	addded
90	P507	2006-06-21	0	added	0	0	0	addded
91	P517	2006-06-21	0	added	0	0	0	addded
92	P526	2020-02-17	0	added	0	0	0	addded
93	P787	2017-02-17	0	added	0	0	0	addded
94	P789	2011-03-21	0	added	0	0	0	addded
95	RAPT	2002-02-18	0	added	0	0	0	addded
96	RDNG	2015-02-19	0	added	0	0	0	addded
97	RHCG	2010-02-17	0	added	0	0	0	addded
98	SHN5	2019-02-16	0	added	0	0	0	addded
99	SILK	2002-03-22	0	added	0	0	0	addded
100	SNHS	2001-04-14	0	added	0	0	0	addded
101	SNTA	2002-06-18	0	added	0	0	0	addded
102	SPMS	2002-01-21	0	added	0	0	0	addded
103	SYNG	2015-02-17	0	added	0	0	0	addded
104	TAFT	2020-04-16	0	added	0	0	0	addded
105	TEHA	2020-04-16	0	added	0	0	0	addded
106	TMAP	2005-04-21	0	added	0	0	0	addded
107	VINZ	2012-04-16	0	added	0	0	0	addded
108	VNCX	2017-03-21	0	added	0	0	0	addded
109	WHYT	2027-06-21	0	added	0	0	0	addded
110	YER1	2008-01-16	0	added	0	0	0	addded
111	YER1	2018-12-18	0	added	0	0	0	addded
112	HARV	94JAN17	2	ci3144585	363.078	198.994	6.7	deleted
113	P654	1931-01-19	1	Antenna_Code_Changed				deleted
114	P303	2022-04-24	1	Receiver_Make_and_Model_Changed				deleted
115	QUEX	2015-01-12	1	Receiver_Make_and_Model_Changed				deleted
116	CSDH	99OCT16	2	ci9108652	575.44	200.819	7.1	deleted
117	SBRB	1930-05-13	1	Elevation_Cutoff_Changed				deleted
118	PVHS	2016-02-24	1	Antenna_Code_Changed				deleted
119	P581	2013-03-24	1	Antenna_Code_Changed				deleted
120	GLRS	99OCT16	2	ci9108652	575.44	162.871	7.1	deleted
121	CRFP	2021-02-12	1	Antenna_and_Radome_Codes_Changed				deleted
122	CUHS	2008-03-24	1	Elevation_Cutoff_Changed				deleted
123	THMG	2020-06-12	1	Elevation_Cutoff_Changed				deleted
124	SILK	2015-02-24	1	Elevation_Cutoff_Changed				deleted
125	TABV	2021-11-13	1	Antenna_and_Radome_Codes_Changed				deleted
126	RSTP	99OCT16	2	ci9108652	575.44	178.734	7.1	deleted
127	P242	2008-04-24	1	Antenna_Code_Changed				deleted
128	BUEG	2023-02-24	1	Receiver_Make_and_Model_Changed				deleted
129	BRIB	2022-12-03	2	nc21323712	288.403	263.904	6.5	deleted
130	P560	2016-08-18	1	Elevation_Cutoff_Changed				deleted
131	CSST	2022-12-03	2	nc21323712	288.403	213.133	6.5	deleted
132	HUNT	2022-12-03	2	nc21323712	288.403	66.083	6.5	deleted
133	P498	2008-05-24	1	Receiver_Make_and_Model_Changed				deleted
134	LINJ	2012-01-12	1	Elevation_Cutoff_Changed				deleted
135	PBL2	2022-12-03	2	nc21323712	288.403	266.632	6.5	deleted
136	SOMT	2022-12-03	2	nc21323712	288.403	240.727	6.5	deleted
137	HAR7	2022-03-24	1	Elevation_Cutoff_Changed				deleted
138	TOST	2022-12-03	2	nc21323712	288.403	261.966	6.5	deleted
139	LPHS	2008-06-12	1	Elevation_Cutoff_Changed				deleted
140	TWMS	2016-02-22	1	Receiver_Make_and_Model_Changed				deleted
141	P233	2009-04-24	1	Receiver_Make_and_Model_Changed				deleted
142	P209	2004-08-17	1	Elevation_Cutoff_Changed				deleted
143	TJRN	2028-09-04	2	nc30228270	162.181	149.924	6	deleted
144	CRRS	2012-01-24	1	Receiver_Make_and_Model_Changed				deleted
145	PALX	2027-03-19	1	Elevation_Cutoff_Changed				deleted
146	P608	2007-03-24	1	Antenna_Code_Changed				deleted
147	P479	2028-03-19	1	Elevation_Cutoff_Changed				deleted
148	BCWR	2014-11-13	1	Antenna_Code_Changed				deleted
149	SUTB	2015-06-05	2	usp000dt25	645.654	420.41	7.2	deleted
150	UTKA	2011-12-18	1	Unknown_event				deleted
151	VIRC	2015-06-05	2	usp000dt25	645.654	577.375	7.2	deleted
152	P504	2003-03-24	1	Receiver_Make_and_Model_Changed				deleted
153	PHJX	2013-02-14	1	Elevation_Cutoff_Changed				deleted
154	ARM1	2021-03-22	1	Receiver_Make_and_Model_Changed				deleted
155	UTJU	2011-12-18	1	Unknown_event				deleted
156	CARS	2026-04-08	2	nn00242554	51.286	43.194	5	deleted
157	INV1	2026-04-08	2	nn00242554	51.286	29.987	5	deleted
158	P656	2014-11-13	1	Antenna_and_Radome_Codes_Changed				deleted
159	CRFP	2021-02-12	1	Receiver_Make_and_Model_Changed				deleted
160	P667	2012-06-13	1	Radome_Code_Changed				deleted
161	P487	1930-12-09	2	ci14565620	128.825	124.77	5.8	deleted
162	P499	1930-12-09	2	ci14565620	128.825	63.78	5.8	deleted
163	P156	2010-01-10	2	nc71338066	288.403	96.497	6.5	deleted
164	P581	2028-03-19	1	Elevation_Cutoff_Changed				deleted
165	P158	2010-01-10	2	nc71338066	288.403	55.657	6.5	deleted
166	P186	2010-01-10	2	nc71338066	288.403	194.732	6.5	deleted
167	P187	2010-01-10	2	nc71338066	288.403	171.751	6.5	deleted
168	HOLP	2023-06-21	1	Antenna_Code_Changed				deleted
169	CRRS	2014-12-17	1	Elevation_Cutoff_Changed				deleted
170	SGU1	2018-02-12	1	Antenna_and_Radome_Codes_Changed				deleted
171	SGPS	2025-09-12	1	Elevation_Cutoff_Changed				deleted
172	P233	2009-04-24	1	Antenna_Code_Changed				deleted
173	DAM2	2010-10-12	1	Elevation_Cutoff_Changed				deleted
174	ELSC	2028-02-12	1	Antenna_Code_Changed				deleted
175	THMG	2020-06-12	1	Receiver_Make_and_Model_Changed				deleted
176	QHTP	1930-04-24	1	Antenna_Code_Changed				deleted
177	COTD	2004-04-10	2	ci14607652	645.654	190.321	7.2	deleted
178	P504	2003-03-24	1	Antenna_Code_Changed				deleted
179	ARM1	2021-03-22	1	Antenna_Code_Changed				deleted
180	GDEC	2004-04-10	2	ci14607652	645.654	531.548	7.2	deleted
181	P235	2010-04-24	1	Receiver_Make_and_Model_Changed				deleted
182	P303	2014-04-16	1	Elevation_Cutoff_Changed				deleted
183	IBEX	2004-04-10	2	ci14607652	645.654	408.222	7.2	deleted
184	PHJX	2011-04-24	1	Receiver_Make_and_Model_Changed				deleted
185	FSHB	2021-03-12	1	Receiver_Make_and_Model_Changed				deleted
186	ALPP	2007-10-21	1	Elevation_Cutoff_Changed				deleted
187	P209	2009-02-24	1	Antenna_Code_Changed				deleted
188	SILK	2014-03-13	1	Antenna_Code_Changed				deleted
189	LINJ	2012-01-12	1	Receiver_Make_and_Model_Changed				deleted
190	P486	2004-04-10	2	ci14607652	645.654	144.735	7.2	deleted
191	P658	2021-09-22	1	Elevation_Cutoff_Changed				deleted
192	P069	2003-03-16	1	Elevation_Cutoff_Changed				deleted
193	HAR7	2022-03-24	1	Receiver_Make_and_Model_Changed				deleted
194	LPHS	2008-06-12	1	Receiver_Make_and_Model_Changed				deleted
195	BUEG	2023-02-24	1	Elevation_Cutoff_Changed				deleted
196	SGDM	2025-03-22	1	Receiver_Make_and_Model_Changed				deleted
197	P568	2004-04-10	2	ci14607652	645.654	421.155	7.2	deleted
198	P584	2004-04-10	2	ci14607652	645.654	236.036	7.2	deleted
199	RSVY	2022-05-24	1	Receiver_Make_and_Model_Changed				deleted
200	CUHS	2008-03-24	1	Antenna_Code_Changed				deleted
201	SILK	2015-02-24	1	Antenna_Code_Changed				deleted
202	P620	2004-04-10	2	ci14607652	645.654	396.882	7.2	deleted
203	P622	2004-04-10	2	ci14607652	645.654	319.951	7.2	deleted
204	RHCG	2028-03-24	1	Elevation_Cutoff_Changed				deleted
205	PLSB	2021-02-12	1	Elevation_Cutoff_Changed				deleted
206	P795	2004-04-10	2	ci14607652	645.654	259.438	7.2	deleted
207	TWMS	2016-02-22	1	Elevation_Cutoff_Changed				deleted
208	P608	2007-03-24	1	Receiver_Make_and_Model_Changed				deleted
209	WGPP	2004-04-10	2	ci14607652	645.654	456.387	7.2	deleted
210	P233	2005-08-15	1	Elevation_Cutoff_Changed				deleted
211	P505	2008-10-14	1	Elevation_Cutoff_Changed				deleted
212	SLMS	2015-06-10	2	ci14745580	114.815	65.591	5.7	deleted
213	CRFP	2021-02-12	1	Elevation_Cutoff_Changed				deleted
214	THMG	2020-06-12	1	Antenna_and_Radome_Codes_Changed				deleted
215	HAR7	2022-03-24	1	Antenna_Code_Changed				deleted
216	LPHS	2008-06-12	1	Antenna_Code_Changed				deleted
217	P481	2026-08-12	2	ci15200401	81.283	49.039	5.4	deleted
218	HOLP	2023-06-21	1	Receiver_Make_and_Model_Changed				deleted
219	DAM2	2010-10-12	1	Receiver_Make_and_Model_Changed				deleted
220	SGDM	2025-03-22	1	Antenna_Code_Changed				deleted
221	RSVY	2022-05-24	1	Antenna_Code_Changed				deleted
222	UTTP	2011-12-18	1	Unknown_event				deleted
223	P144	2025-10-16	1	Elevation_Cutoff_Changed				deleted
224	ELSC	2028-02-12	1	Receiver_Make_and_Model_Changed				deleted
225	FARB	2010-03-14	2	nc72182046	407.38	393.629	6.8	deleted
226	HEAV	2010-03-14	2	nc72182046	407.38	370.764	6.8	deleted
227	MSC1	2020-06-12	1	Receiver_Make_and_Model_Changed				deleted
228	OHLN	2010-03-14	2	nc72182046	407.38	398.558	6.8	deleted
229	QHTP	1930-04-24	1	Receiver_Make_and_Model_Changed				deleted
230	P507	2007-05-24	1	Receiver_Make_and_Model_Changed				deleted
231	P268	2010-03-14	2	nc72182046	407.38	397.085	6.8	deleted
232	P270	2010-03-14	2	nc72182046	407.38	315.805	6.8	deleted
233	PVHS	2016-02-24	1	Elevation_Cutoff_Changed				deleted
234	UTMI	2016-05-11	1	Unknown_event				deleted
235	RSVY	2027-03-19	1	Elevation_Cutoff_Changed				deleted
236	UTKA	1931-10-23	1	Unknown_event				deleted
237	ALPP	2007-10-21	1	Receiver_Make_and_Model_Changed				deleted
238	P608	2027-03-19	1	Elevation_Cutoff_Changed				deleted
239	P209	2009-02-24	1	Receiver_Make_and_Model_Changed				deleted
240	P477	2008-02-24	1	Receiver_Make_and_Model_Changed				deleted
241	FSHB	2021-03-12	1	Elevation_Cutoff_Changed				deleted
242	MONB	2007-05-14	1	Radome_Code_Changed				deleted
243	SGPS	2025-09-12	1	Antenna_Code_Changed				deleted
244	P252	2024-08-14	2	nc72282711	162.181	160.323	6	deleted
245	P257	2024-08-14	2	nc72282711	162.181	90.233	6	deleted
246	P266	2024-08-14	2	nc72282711	162.181	41.11	6	deleted
247	P267	2024-08-14	2	nc72282711	162.181	46.461	6	deleted
248	P242	2008-04-24	1	Elevation_Cutoff_Changed				deleted
249	UCD1	2024-08-14	2	nc72282711	162.181	60.551	6	deleted
250	P303	2022-04-24	1	Antenna_Code_Changed				deleted
251	RHCG	2028-03-24	1	Receiver_Make_and_Model_Changed				deleted
252	GASB	2008-12-16	2	us20007z6r	323.594	309.008	6.6	deleted
253	P554	2013-08-18	1	Elevation_Cutoff_Changed				deleted
254	CUHS	2008-03-24	1	Receiver_Make_and_Model_Changed				deleted
255	SILK	2015-02-24	1	Receiver_Make_and_Model_Changed				deleted
256	LMSG	2012-08-14	1	Elevation_Cutoff_Changed				deleted
257	P144	2027-04-24	1	Receiver_Make_and_Model_Changed				deleted
258	UTRI	2023-05-20	1	Unknown_event				deleted
259	P496	2021-12-16	1	Elevation_Cutoff_Changed				deleted
260	SPK1	2012-05-22	1	Radome_Code_Changed				deleted
261	P554	2011-03-24	1	Receiver_Make_and_Model_Changed				deleted
262	ALPP	2007-10-21	1	Antenna_Code_Changed				deleted
263	P507	2028-03-19	1	Elevation_Cutoff_Changed				deleted
264	CHIL	95MAY30	1	Antenna_and_Radome_Codes_Changed				deleted
265	P560	2018-01-24	1	Receiver_Make_and_Model_Changed				deleted
266	P477	2028-03-19	1	Elevation_Cutoff_Changed				deleted
267	DAM2	2010-10-12	1	Antenna_and_Radome_Codes_Changed				deleted
268	P477	2008-02-24	1	Antenna_Code_Changed				deleted
269	P578	2029-03-16	1	Elevation_Cutoff_Changed				deleted
270	MSC1	2020-06-12	1	Antenna_and_Radome_Codes_Changed				deleted
271	BUEG	2023-02-24	1	Antenna_Code_Changed				deleted
272	P660	2001-11-17	1	Antenna_Code_Changed				deleted
273	CACC	2004-03-24	1	Receiver_Make_and_Model_Changed				deleted
274	OHLN	2001-03-24	1	Antenna_and_Radome_Codes_Changed				deleted
275	MRDM	2025-03-22	1	Receiver_Make_and_Model_Changed				deleted
276	RHCG	2028-03-24	1	Antenna_Code_Changed				deleted
277	P158	2023-06-19	2	nc73201181	102.329	23.286	5.6	deleted
278	PLSB	2021-02-12	1	Antenna_Code_Changed				deleted
279	P314	2023-06-19	2	nc73201181	102.329	89.553	5.6	deleted
280	HOLP	2023-06-21	1	Elevation_Cutoff_Changed				deleted
281	ALPP	2004-07-19	2	ci38443183	257.04	145.89	6.4	deleted
282	ARM1	2004-07-19	2	ci38443183	257.04	139.19	6.4	deleted
283	BCWR	2004-07-19	2	ci38443183	257.04	193.389	6.4	deleted
284	TWMS	2016-02-22	1	Antenna_Code_Changed				deleted
285	BLSA	2004-07-19	2	ci38443183	257.04	217.267	6.4	deleted
286	CA00	2004-07-19	2	ci38443183	257.04	172.601	6.4	deleted
287	CAC1	2004-07-19	2	ci38443183	257.04	234.493	6.4	deleted
288	CAL5	2004-07-19	2	ci38443183	257.04	189.902	6.4	deleted
289	P504	2013-12-18	1	Elevation_Cutoff_Changed				deleted
290	CCCC	2004-07-19	2	ci38443183	257.04	21.705	6.4	deleted
291	OHLN	2007-08-14	1	Elevation_Cutoff_Changed				deleted
292	CLV1	2004-07-19	2	ci38443183	257.04	209.893	6.4	deleted
293	PVHS	2016-02-24	1	Receiver_Make_and_Model_Changed				deleted
294	COTD	2004-07-19	2	ci38443183	257.04	241.951	6.4	deleted
295	CRFP	2004-07-19	2	ci38443183	257.04	188.91	6.4	deleted
296	P581	2013-03-24	1	Receiver_Make_and_Model_Changed				deleted
297	P554	2011-03-24	1	Antenna_Code_Changed				deleted
298	DAM2	2004-07-19	2	ci38443183	257.04	172.729	6.4	deleted
299	ELSC	2028-02-12	1	Elevation_Cutoff_Changed				deleted
300	ELSC	2004-07-19	2	ci38443183	257.04	197.091	6.4	deleted
301	MSC1	2020-06-12	1	Elevation_Cutoff_Changed				deleted
302	P535	2028-03-19	1	Elevation_Cutoff_Changed				deleted
303	GDEC	2004-07-19	2	ci38443183	257.04	221.325	6.4	deleted
304	P560	2018-01-24	1	Antenna_Code_Changed				deleted
305	QHTP	1930-04-24	1	Elevation_Cutoff_Changed				deleted
306	HIGH	2004-07-19	2	ci38443183	257.04	137.476	6.4	deleted
307	HOLP	2004-07-19	2	ci38443183	257.04	207.09	6.4	deleted
308	MRDM	2004-07-19	2	ci38443183	257.04	173.587	6.4	deleted
309	ARM1	2021-03-22	1	Elevation_Cutoff_Changed				deleted
310	NVPO	2004-07-19	2	ci38443183	257.04	183.176	6.4	deleted
311	NVSL	2004-07-19	2	ci38443183	257.04	235.024	6.4	deleted
312	OPCL	2004-07-19	2	ci38443183	257.04	179.094	6.4	deleted
313	P474	1931-10-19	1	Antenna_Code_Changed				deleted
314	P242	2008-04-24	1	Receiver_Make_and_Model_Changed				deleted
315	SGPS	2025-09-12	1	Receiver_Make_and_Model_Changed				deleted
316	MRDM	2025-03-22	1	Antenna_Code_Changed				deleted
317	P580	2004-07-19	2	ci38443183	257.04	29.67	6.4	deleted
318	P594	2004-07-19	2	ci38443183	257.04	23.624	6.4	deleted
319	P595	2004-07-19	2	ci38443183	257.04	9.157	6.4	deleted
320	P740	2004-07-19	2	ci38443183	257.04	248.576	6.4	deleted
321	P741	2004-07-19	2	ci38443183	257.04	254.868	6.4	deleted
322	SGDM	2004-07-19	2	ci38443183	257.04	169.915	6.4	deleted
323	SILK	2004-07-19	2	ci38443183	257.04	191.187	6.4	deleted
324	SPK1	2004-07-19	2	ci38443183	257.04	210.602	6.4	deleted
325	TRAK	2004-07-19	2	ci38443183	257.04	233.716	6.4	deleted
326	TWMS	2004-07-19	2	ci38443183	257.04	193.743	6.4	deleted
327	UNR1	2004-07-19	2	ci38443183	257.04	212.196	6.4	deleted
328	AZPA	2006-07-19	2	ci38457511	575.44	538.223	7.1	deleted
329	MRDM	2006-07-19	2	ci38457511	575.44	179.132	7.1	deleted
330	SGDM	2006-07-19	2	ci38457511	575.44	175.53	7.1	deleted
331	P159	2009-03-20	2	nc73351710	128.825	69.761	5.8	deleted
332	P723	2024-06-20	2	ci39493944	128.825	123.362	5.8	deleted
333	P499	2001-10-20	2	ci39641528	45.709	12.758	4.9	deleted
334	CACC	2020-12-22	2	nc73821036	257.04	137.188	6.4	deleted
335	P156	2020-12-22	2	nc73821036	257.04	70.858	6.4	deleted
336	P655	2020-12-22	2	nc73821036	257.04	204.98	6.4	deleted
337	P659	2020-12-22	2	nc73821036	257.04	221.171	6.4	deleted
338	P660	2020-12-22	2	nc73821036	257.04	220.857	6.4	deleted
339	P671	2012-05-23	2	nc73887046	64.565	36.033	5.2	deleted
340	QUIN	2012-05-23	2	nc73887046	64.565	29.008	5.2	deleted
341	SSNV	2012-05-23	2	nc73887046	64.565	56.554	5.2	deleted
342	SUSA	2012-05-23	2	nc73887046	64.565	52.319	5.2	deleted
